# Supplementary material for: The Effectiveness of Nutrition Interventions Combined with Exercise in Upper Gastrointestinal Cancers: A Systematic Review
Source: MDPI journal article supplement (doi:10.3390/nu13082842), 2021-08-18
Supplement: s1 [file s1]

# **The effectiveness of nutrition interventions combined with exercise in upper gastrointestinal cancer- a systematic review**

## **SUPPLEMENTARY MATERIAL**

### **Contents**

|                                                     |   |
|-----------------------------------------------------|---|
| S1.Search Terms .....                               | 2 |
| S2.Details of Relevant Ongoing Clinical Trials..... | 7 |

## S1. Search Terms

| Data Base | Search Strategy                                                                                                                                                                                                                                                                                                                                                                                                                                                                                                                                                                                                                                                                                                                                                                                                                                                                                                                                                                                                                                                                                                                                                                                                                                                                                                                                                                                                                                                                                                                                                                                                                                                                                                                                                                                                                                                                                                                                                                                                                                                                                                                                                                                                                                                                                                                                                                                                                                                                                                                                                                                                                                                             |
|-----------|-----------------------------------------------------------------------------------------------------------------------------------------------------------------------------------------------------------------------------------------------------------------------------------------------------------------------------------------------------------------------------------------------------------------------------------------------------------------------------------------------------------------------------------------------------------------------------------------------------------------------------------------------------------------------------------------------------------------------------------------------------------------------------------------------------------------------------------------------------------------------------------------------------------------------------------------------------------------------------------------------------------------------------------------------------------------------------------------------------------------------------------------------------------------------------------------------------------------------------------------------------------------------------------------------------------------------------------------------------------------------------------------------------------------------------------------------------------------------------------------------------------------------------------------------------------------------------------------------------------------------------------------------------------------------------------------------------------------------------------------------------------------------------------------------------------------------------------------------------------------------------------------------------------------------------------------------------------------------------------------------------------------------------------------------------------------------------------------------------------------------------------------------------------------------------------------------------------------------------------------------------------------------------------------------------------------------------------------------------------------------------------------------------------------------------------------------------------------------------------------------------------------------------------------------------------------------------------------------------------------------------------------------------------------------------|
| EMBASE    | <p>1.'digestive system tumor cell line'/exp OR 'digestive system tumor'/exp</p> <p>2.((oesophag* OR esophag* OR gastroesophag*) NEAR/3 (cancer* OR neoplasm* OR tumo?r* OR adenocarcinoma* OR carcinoma*)):ab,ti</p> <p>3.((stomach OR gastric) NEAR/3 (cancer* OR neoplasm* OR tumo?r* OR adenocarcinoma* OR carcinoma*)):ab,ti</p> <p>4.(('bile duct*' OR gallbladder* OR biliary OR liver OR hepato* OR hepatic) NEAR/3 (cancer* OR neoplasm* OR tumo?r* OR adenocarcinoma* OR carcinoma*)):ab,ti</p> <p>5.(pancrea* NEAR/3 (cancer* OR neoplasm* OR tumo?r* OR adenocarcinoma* OR carcinoma*)):ab,ti</p> <p>6.(('upper gi' OR 'upper gastrointestinal') NEAR/3 (cancer* OR neoplasm* OR tumo?r* OR adenocarcinoma* OR carcinoma*)):ab,ti</p> <p>7.#1 OR #2 OR #3 OR #4 OR #5 OR #6</p> <p>8.'nutrition education'/exp OR 'diet therapy'/exp OR 'cooking'/exp OR 'nutrition'/exp OR 'enteric feeding'/exp OR 'parenteral nutrition'/exp OR 'nutritional support'/exp OR 'nutrition service'/exp OR 'cachexia'/exp</p> <p>9.(Nutrition* NEAR/3 (intervention* OR therap* OR education OR support* OR treatment* OR consultation? OR consult? OR cancer* OR counsel*)):ti,ab</p> <p>10.((diet? OR dietary) NEAR/3 (intervention* OR therap* OR education OR support* OR treatment* OR consultation? OR consult? OR cancer* OR counsel* OR restrict*)):ti,ab</p> <p>11.(Parenteral NEAR/3 (alimentation OR feed* OR fluid OR hyperalimentation)):ti,ab</p> <p>12.(Nutrition* NEAR/3 (product* OR supplement* OR support* OR mixture)):ti,ab</p> <p>13.(Diet* NEAR/3 (product* OR supplement* OR support* OR mixture)):ti,ab</p> <p>14.((Diet* OR nutrition*) NEAR/5 (educat* OR guideline*)):ti,ab</p> <p>15.#8 OR #9 OR #10 OR #11 OR #12 OR #13 OR #14</p> <p>16.'exercise'/exp OR 'kinesiotherapy'/exp OR 'physical activity'/exp OR 'physical activity, capacity and performance'/de OR 'training'/de OR 'endurance'/de OR 'exercise tolerance'/de OR 'physical capacity'/de OR 'sport'/exp</p> <p>17.(exercis* OR isometric* or isotonic* or isokinetic*):ti,ab</p> <p>18.((resistance OR strength*) NEAR/3 train*):ti,ab</p> <p>19.((physical* or motion* or cardiopulmonary or cardiorespiratory) NEAR/3 (fit* or therap*)):ti,ab</p> <p>20.(treadmill* or cross-train* or rowing or sport* OR exercise* OR "physical activit*" OR aerobic* OR run or jog* or running OR walk or walks or walking OR gym* OR yoga OR pilates OR "recreation* activit*" OR zumba or salsa* OR cycling or bicycle or bike or swim* or dance or dancer* or dances or dancing or HIIT):ti,ab</p> <p>21.(circuit* NEAR/1 train*):ti,ab</p> <p>22.(keep* NEAR/1 (active or fit)):ti,ab</p> |

|                |                                                                                                                                                                                                                                                                                                                                                                                                                                                                                                                                                                                                                                                                                                                                                                                                                                                                                                                                                                                                                                                                                                                                                                                                                                                                                                                                                                                                                                                                                                                                                                                                                                                                                                                                                                                                                                                                                                                                                                                                                                                                                                                                                                                                                                                                                                                                                                                                                                                                                                                                                                                 |
|----------------|---------------------------------------------------------------------------------------------------------------------------------------------------------------------------------------------------------------------------------------------------------------------------------------------------------------------------------------------------------------------------------------------------------------------------------------------------------------------------------------------------------------------------------------------------------------------------------------------------------------------------------------------------------------------------------------------------------------------------------------------------------------------------------------------------------------------------------------------------------------------------------------------------------------------------------------------------------------------------------------------------------------------------------------------------------------------------------------------------------------------------------------------------------------------------------------------------------------------------------------------------------------------------------------------------------------------------------------------------------------------------------------------------------------------------------------------------------------------------------------------------------------------------------------------------------------------------------------------------------------------------------------------------------------------------------------------------------------------------------------------------------------------------------------------------------------------------------------------------------------------------------------------------------------------------------------------------------------------------------------------------------------------------------------------------------------------------------------------------------------------------------------------------------------------------------------------------------------------------------------------------------------------------------------------------------------------------------------------------------------------------------------------------------------------------------------------------------------------------------------------------------------------------------------------------------------------------------|
|                | 23.#16 OR #17 OR #18 OR #19 OR #20 OR #21 OR #22<br>24.#7 AND #15 AND #23<br>25.'conference abstract':it OR 'conference review':it OR 'editorial':it OR 'letter':it<br>26.#24 NOT #25                                                                                                                                                                                                                                                                                                                                                                                                                                                                                                                                                                                                                                                                                                                                                                                                                                                                                                                                                                                                                                                                                                                                                                                                                                                                                                                                                                                                                                                                                                                                                                                                                                                                                                                                                                                                                                                                                                                                                                                                                                                                                                                                                                                                                                                                                                                                                                                           |
| Medline (OVID) | 1.exp Esophageal Neoplasms/ OR Stomach Neoplasms/ OR exp Biliary Tract Neoplasms/ or exp Liver Neoplasms/ or exp Pancreatic Neoplasms/ OR Gastrointestinal Neoplasms/<br>2.((oesophag* OR esophag* OR gastroesophag*) ADJ3 (cancer* OR neoplasm* OR tumor* OR adenocarcinoma* OR carcinoma*)).ti,ab.<br>3.((stomach OR gastric) ADJ3 (cancer* OR neoplasm* OR tumor* OR adenocarcinoma* OR carcinoma*)).ti,ab.<br>4.((bile duct* OR gallbladder* OR biliary OR liver OR hepato* OR hepatic) ADJ3 (cancer* OR neoplasm* OR tumor* OR adenocarcinoma* OR carcinoma*)).ti,ab.<br>5.(pancrea* ADJ3 (cancer* OR neoplasm* OR tumor* OR adenocarcinoma* OR carcinoma*)).ti,ab.<br>6.((upper gi OR upper gastrointestinal) ADJ3 (cancer* OR neoplasm* OR tumor* OR adenocarcinoma* OR carcinoma*)).ti,ab.<br>7.or/1-6<br>8.exp Nutrition Therapy/ OR Nutrition Assessment/ OR Cachexia/ OR Diet Records/ OR exp Nutrition Surveys/ OR Nutritional Status/ OR Dietetics/ OR Nutrition Policy/<br>9.(Nutrition* ADJ3 (intervention* OR therap* OR education OR support* OR treatment* OR consultation? OR consult? OR cancer* OR counsel*)).ti,ab.<br>10.((diet? OR dietary) ADJ3 (intervention* OR therap* OR education OR support* OR treatment* OR consultation? OR consult? OR cancer* OR counsel* OR restrict*)).ti,ab.<br>11.(Parenteral ADJ3 (alimentation OR feed* OR fluid OR hyperalimentation)).ti,ab.<br>12.(Nutrition* ADJ3 (product* OR supplement* OR support* OR mixture)).ti,ab.<br>13.(Diet* ADJ3 (product* OR supplement* OR support* OR mixture)).ti,ab.<br>14.((Diet* OR nutrition*) ADJ5 (educat* OR guideline* OR factor*)).ti,ab.<br>15.or/8-14<br>16.exp Exercise/ OR exp Exercise Therapy/ OR exp Physical Fitness/ OR exp "physical education and training"/ OR exp "Exercise Movement Techniques"/ or physical endurance/ or exercise tolerance/ OR Physical Exertion/ or exp Sports/ or Dancing/<br>17.(isometric* or isotonic* or isokinetic* or exercis*).ti,ab.<br>18.((resistance OR strength) adj3 (train* OR exercise*)).ti,ab.<br>19.((physical* or motion* or cardiopulmonary or cardiorespiratory) adj3 (fit* or therap* or activit*)).ti,ab.<br>20.(treadmill* or cross-train* or rowing or sport* or exercise* or physical* activit* or aerobic* or run or jog* or running or walk or walks or walking or gym* or yoga or pilates or "recreation* activit*" or zumba or salsa* or cycling or bicycle or bike or swim* or dance or dancer* or dances or dancing or physiotherapy* or physical therap*).ti,ab.<br>21.(circuit* adj1 train*).ti,ab. |

|                |                                                                                                                                                                                                                                                                                                                                                                                                                                                                                                                                                                                                                                                                                                                                                                                                                                                                                                                                                                                                                                                                                                                                                                                                                                                                                                                                                                                                                                                                                                                                                                                                                                                                                                                                                                                                                                                                                                                                                                                                                             |
|----------------|-----------------------------------------------------------------------------------------------------------------------------------------------------------------------------------------------------------------------------------------------------------------------------------------------------------------------------------------------------------------------------------------------------------------------------------------------------------------------------------------------------------------------------------------------------------------------------------------------------------------------------------------------------------------------------------------------------------------------------------------------------------------------------------------------------------------------------------------------------------------------------------------------------------------------------------------------------------------------------------------------------------------------------------------------------------------------------------------------------------------------------------------------------------------------------------------------------------------------------------------------------------------------------------------------------------------------------------------------------------------------------------------------------------------------------------------------------------------------------------------------------------------------------------------------------------------------------------------------------------------------------------------------------------------------------------------------------------------------------------------------------------------------------------------------------------------------------------------------------------------------------------------------------------------------------------------------------------------------------------------------------------------------------|
|                | 22.(keep* adj1 (active or fit)).ti,ab.<br>23.or/16-22<br>24.7 AND 15 AND 23                                                                                                                                                                                                                                                                                                                                                                                                                                                                                                                                                                                                                                                                                                                                                                                                                                                                                                                                                                                                                                                                                                                                                                                                                                                                                                                                                                                                                                                                                                                                                                                                                                                                                                                                                                                                                                                                                                                                                 |
| Web of Science | TS =((((oesophag* OR esophag* OR gastroesophag*) NEAR/2 (cancer* OR neoplasm* OR tumo*r* OR adenocarcinoma* OR carcinoma*)) OR ((stomach OR gastric) NEAR/2 (cancer* OR neoplasm* OR tumo*r* OR adenocarcinoma* OR carcinoma*)) OR ((“bile duct*” OR gallbladder* OR biliary OR liver OR hepato* OR hepatic) NEAR/2 (cancer* OR neoplasm* OR tumo*r* OR adenocarcinoma* OR carcinoma*)) OR (pancrea* NEAR/2 (cancer* OR neoplasm* OR tumo*r* OR adenocarcinoma* OR carcinoma*)) OR ((“upper gi” OR “upper gastrointestinal”) NEAR/2 (cancer* OR neoplasm* OR tumo*r* OR adenocarcinoma* OR carcinoma*))) AND ((Nutrition* NEAR/2 (intervention* OR therap* OR education OR support* OR treatment* OR consultation* OR consult* OR cancer* OR counsel*)) OR ((diet* OR dietary) NEAR/2 (intervention* OR therap* OR education OR support* OR treatment* OR consultation* OR consult* OR cancer* OR counsel* OR restrict*)) OR (Parenteral NEAR/2 (alimentation OR feed* OR fluid OR hyperalimentation)) OR (Nutrition* NEAR/2 (product* OR supplement* OR support* OR mixture)) OR (Diet* NEAR/2 (product* OR supplement* OR support* OR mixture)) OR ((Diet* OR nutrition*) NEAR/5 educat*)) AND ((exercis* OR isometric* or isotonic* or isokinetic*) OR ((resistance OR strength*) NEAR/2 train*) OR ((physical* or motion* or cardiopulmonary or cardiorespiratory) NEAR/2 (fit* or therap*)) OR (treadmill* or cross-train* or rowing or sport* OR exercise* OR "physical activit*" OR aerobic* OR run or jog* or running OR walk or walks or walking OR gym* OR yoga OR pilates OR "recreation* activit*" OR zumba or salsa* OR cycling or bicycle or bike or swim* or dance or dancer* or dances or dancing or HIIT) OR (circuit* NEAR/1 train*) OR (keep* NEAR/1 (active or fit))))                                                                                                                                                                                                                                  |
| CINAHL         | 1.(MH "Biliary Tract Neoplasms+") OR (MH "Liver Neoplasms+") OR (MH "Pancreatic Neoplasms+") OR (MH "Esophageal Neoplasms+") OR (MH "Stomach Neoplasms")<br>2.TI ((oesophag* OR esophag* OR gastroesophag*) N2 (cancer* OR neoplasm* OR tumo#r* OR adenocarcinoma* OR carcinoma*)) OR AB ((oesophag* OR esophag* OR gastroesophag*) N2 (cancer* OR neoplasm* OR tumo#r* OR adenocarcinoma* OR carcinoma*))<br>3.TI ((stomach OR gastric) N2 (cancer* OR neoplasm* OR tumo#r* OR adenocarcinoma* OR carcinoma*)) OR AB ((stomach OR gastric) N2 (cancer* OR neoplasm* OR tumo#r* OR adenocarcinoma* OR carcinoma*))<br>4.TI ((“bile duct*” OR gallbladder* OR biliary OR liver OR hepato* OR hepatic) N2 (cancer* OR neoplasm* OR tumo#r* OR adenocarcinoma* OR carcinoma*)) OR AB ((“bile duct*” OR gallbladder* OR biliary OR liver OR hepato* OR hepatic) N2 (cancer* OR neoplasm* OR tumo#r* OR adenocarcinoma* OR carcinoma*))<br>5.TI (pancrea* N2 (cancer* OR neoplasm* OR tumo#r* OR adenocarcinoma* OR carcinoma*)) OR AB (pancrea* N2 (cancer* OR neoplasm* OR tumo#r* OR adenocarcinoma* OR carcinoma*))<br>6.TI ((“upper gi” OR “upper gastrointestinal”) N2 (cancer* OR neoplasm* OR tumo#r* OR adenocarcinoma* OR carcinoma*)) OR AB ((“upper gi” OR “upper gastrointestinal”) N2 (cancer* OR neoplasm* OR tumo#r* OR adenocarcinoma* OR carcinoma*))<br>7.S1 OR S2 OR S3 OR S4 OR S5 OR S6<br>8.MH "Nutrition Education" OR MH "Nutritional Status" OR MH "Food Habits" OR MH "Diet" OR MH "Nutritional Counseling" OR MH "Nutritional Assessment" OR MH "Nutritional Requirements" OR MH "Nutritional Support" OR MH "Parenteral Nutrition" OR MH "Enteral Nutrition" OR MH "Dietary Supplements" OR MH "Cachexia"<br>9.TI (Nutrition* N2 (intervention* OR therap* OR education OR support* OR treatment* OR consultation# OR consult# OR cancer* OR counsel*)) OR AB (Nutrition* N2 (intervention* OR therap* OR education OR support* OR treatment* OR consultation# OR consult# OR cancer* OR counsel*)) |

|                  |                                                                                                                                                                                                                                                                                                                                                                                                                                                                                                                                                                                                                                                                                                                                                                                                                                                                                                                                                                                                                                                                                                                                                                                                                                                                                                                                                                                                                                                                                                                                                                                                                                                                                                                                                                                                                                                                                                                                                                                                                                                                                                                                                                                                                                                                                                                                                                                                                                                                                                                                                                                    |
|------------------|------------------------------------------------------------------------------------------------------------------------------------------------------------------------------------------------------------------------------------------------------------------------------------------------------------------------------------------------------------------------------------------------------------------------------------------------------------------------------------------------------------------------------------------------------------------------------------------------------------------------------------------------------------------------------------------------------------------------------------------------------------------------------------------------------------------------------------------------------------------------------------------------------------------------------------------------------------------------------------------------------------------------------------------------------------------------------------------------------------------------------------------------------------------------------------------------------------------------------------------------------------------------------------------------------------------------------------------------------------------------------------------------------------------------------------------------------------------------------------------------------------------------------------------------------------------------------------------------------------------------------------------------------------------------------------------------------------------------------------------------------------------------------------------------------------------------------------------------------------------------------------------------------------------------------------------------------------------------------------------------------------------------------------------------------------------------------------------------------------------------------------------------------------------------------------------------------------------------------------------------------------------------------------------------------------------------------------------------------------------------------------------------------------------------------------------------------------------------------------------------------------------------------------------------------------------------------------|
|                  | <p>10.TI ((diet# OR dietary) N2 (intervention* OR therap* OR education OR support* OR treatment* OR consultation# OR consult* OR cancer* OR counsel* OR restrict*)) OR AB ((diet# OR dietary) N2 (intervention* OR therap* OR education OR support* OR treatment* OR consultation# OR consult* OR cancer* OR counsel* OR restrict*))</p> <p>11.TI (Parenteral N2 (alimentation OR feed* OR fluid OR hyperalimentation)) OR AB (Parenteral N2 (alimentation OR feed* OR fluid OR hyperalimentation))</p> <p>12.TI (Nutrition* N2 (product* OR supplement* OR support* OR mixture)) OR AB (Nutrition* N2 (product* OR supplement* OR support* OR mixture))</p> <p>13.TI (Diet* N2 (product* OR supplement* OR support* OR mixture)) OR AB (Diet* N2 (product* OR supplement* OR support* OR mixture))</p> <p>14.TI ((Diet* OR nutrition*) N4 (educat*OR guideline* OR factor*)) OR AB ((Diet* OR nutrition*) N4 (educat* OR guideline* OR factor*))</p> <p>15.S9 OR S10 OR S11 OR S12 OR S13 OR S14 OR S15 OR S16</p> <p>16.(MH "Exercise+") OR (MH "Physical Activity") OR (MH "Physical Fitness+") OR (MH "Physical Performance") OR (MH "Sports+") OR (MH "Resistance Training") OR (MH "Therapeutic Exercise+") OR (MH "Exercise Intensity")</p> <p>17.TI (isometric* or isotonic* or isokinetic* OR exercis*) OR AB isometric* or isotonic* or isokinetic* OR exercis*)</p> <p>18.TI ((resistance OR strength) N3 (train* OR exercis*)) OR AB ((resistance OR strength) N3 (train* OR exercis*))</p> <p>19.TI ((physical* or motion* or cardiopulmonary or cardiorespiratory) N3 (fit* or therap*)) OR AB ((physical* or motion* or cardiopulmonary or cardiorespiratory) N3 (fit* or therap*))</p> <p>20.TI (treadmill* or cross-train* or rowing or sport* OR exercise* OR "physical activit*" OR aerobic* OR run or jog* or running OR walk or walks or walking OR gym* OR yoga or pilates OR "recreation* activit*" OR zumba or salsa* OR cycling or bicycle or bike or swim* or dance or dancer* or dances or dancing) OR AB (treadmill* or cross-train* or rowing or sport* OR exercise* OR "physical activit*" OR aerobic* OR run or jog* or running OR walk or walks or walking OR gym* OR yoga or pilates OR "recreation* activit*" OR zumba or salsa* OR cycling or bicycle or bike or swim* or dance or dancer* or dances or dancing)</p> <p>21.TI (circuit* N1 train*) OR AB (circuit* N1 train*)</p> <p>22.TI (keep* N1 (active or fit)) OR AB (keep* N1 (active or fit))</p> <p>23.S16 OR S17 OR S18 OR S19 OR S20 OR S21 OR S22</p> <p>24.S7 AND S15 AND S23</p> |
| Cochrane Library | <p>1.[mh "Esophageal Neoplasms"] OR [mh "Stomach Neoplasms"] OR [mh "Biliary Tract Neoplasms"] OR [mh "Liver Neoplasms"] OR [mh "Pancreatic Neoplasms"]</p> <p>2.((oesophag* OR esophag* OR gastroesophag*) NEAR/3 (cancer* OR neoplasm* OR tumo*r* OR adenocarcinoma* OR carcinoma*)):ti,ab,kw</p> <p>3.((stomach OR gastric) NEAR/3 (cancer* OR neoplasm* OR tumo*r* OR adenocarcinoma* OR carcinoma*)):ti,ab,kw</p> <p>4.((“bile duct*” OR gallbladder* OR biliary OR liver OR hepato* OR hepatic) NEAR/3 (cancer* OR neoplasm* OR tumo*r* OR adenocarcinoma* OR carcinoma*)):ti,ab,kw</p> <p>5.(pancrea* NEAR/3 (cancer* OR neoplasm* OR tumo*r* OR adenocarcinoma* OR carcinoma*)):ti,ab,kw</p> <p>6.((“upper gi” OR “upper gastrointestinal”) NEAR/3 (cancer* OR neoplasm* OR tumo*r* OR adenocarcinoma* OR carcinoma*)):ti,ab,kw</p> <p>7.#1 OR #2 OR #3 OR #4 OR #5 OR #6</p> <p>8.[mh "Nutrition Therapy"] OR [mh "Nutrition Assessment"] OR [mh "Cachexia"] OR [mh "Diet Records"] OR [mh "Nutrition Surveys"] OR [mh "Nutritional Status"] OR [mh "Dietetics"] OR [mh "Nutrition Policy"]</p> <p>9.(Nutrition* NEAR/3 (intervention* OR therap* OR education OR support* OR treatment* OR consultation* OR consult* OR cancer* OR counsel*)):ti,ab,kw</p>                                                                                                                                                                                                                                                                                                                                                                                                                                                                                                                                                                                                                                                                                                                                                                                                                                                                                                                                                                                                                                                                                                                                                                                                                                                                                                               |

10.((diet\* OR dietary) NEAR/3 (intervention\* OR therap\* OR education OR support\* OR treatment\* OR consultation\* OR consult\* OR cancer\* OR counsel\* OR restrict\*)):ti,ab,kw

11.(Parenteral NEAR/3 (alimentation OR feed\* OR fluid OR hyperalimentation)):ti,ab,kw

12.(Nutrition\* NEAR/3 (product\* OR supplement\* OR support\* OR mixture)):ti,ab,kw

13.(Diet\* NEAR/3 (product\* OR supplement\* OR support\* OR mixture)):ti,ab,kw

14.((Diet\* OR nutrition\*) NEAR/5 (educat\*OR guideline\*)):ti,ab,kw

15.#8 OR #9 OR #10 OR #11 OR #12 OR #13 OR #14

16.[mh "Exercise"] OR [mh "Exercise Therapy"] OR [mh "Physical Fitness"] OR [mh "physical education and training"] OR [mh "Exercise Movement Techniques"] or [mh "physical endurance"] or [mh "exercise tolerance"] OR [mh "Physical Exertion"] or [mh "Sports"] or [mh "Dancing"]

17.(isometric\* or isotonic\* or isokinetic\* OR exercis\*):ti,ab,kw

18.((resistance OR strength) NEAR/3 (train\* OR exercise\*)):ti,ab,kw

19.((physical\* or motion\* or cardiopulmonary or cardiorespiratory) NEAR/3 (fit\* or therap\*)):ti,ab,kw

20.(treadmill\* or cross-train\* or rowing or sport\* OR exercise\* OR "physical activit\*" OR aerobic\* OR run or jog\* or running OR walk or walks or walking OR gym\* OR yoga oR pilates OR "recreation\* activit\*" OR zumba or salsa\* OR cycling or bicycle or bike or swim\* or dance or dancer\* or dances or dancing):ti,ab,kw

21.(circuit\* NEAR/1 train\*):ti,ab,kw

22.(keep\* NEAR/1 (active or fit)):ti,ab,kw

23.#16 OR #17 OR #18 OR #19 OR #20 OR #21 OR #22

24.#7 AND #15 AND #23

## S2. Details of Relevant Ongoing Clinical Trials

| Author (PI)       | Title                                                                                                                                                                                   | Clinical Trial Registry           | Registration ID  | URL                                                                                                                                         |
|-------------------|-----------------------------------------------------------------------------------------------------------------------------------------------------------------------------------------|-----------------------------------|------------------|---------------------------------------------------------------------------------------------------------------------------------------------|
| Shinnno Naoki     | Randomized trial of Exercise and Nutritional prehabilitation for Elderly Gastric Cancer patients                                                                                        | Japan Registry of Clinical Trials | jRCTs051190015   | <a href="https://rctportal.niph.go.jp/en/detail?trial_id=jRCTs051190015">https://rctportal.niph.go.jp/en/detail?trial_id=jRCTs051190015</a> |
| Hiroshi Miyata    | Rehabilitation / nutrition intervention trial for elderly patients with oesophageal cancer                                                                                              | Japan Registry of Clinical Trials | jRCTs051190016   | <a href="https://rctportal.niph.go.jp/en/detail?trial_id=jRCTs051190016">https://rctportal.niph.go.jp/en/detail?trial_id=jRCTs051190016</a> |
| Sophie Allen      | A randomised controlled trial to assess whether prehabilitation improves fitness in patients undergoing neoadjuvant treatment prior to oesophagogastric cancer surgery : study protocol | ClinicalTrials.gov                | NCT02950324      | <a href="https://pubmed.ncbi.nlm.nih.gov/30580268/">https://pubmed.ncbi.nlm.nih.gov/30580268/</a>                                           |
| Li Yiran          | A comprehensive intervention to improve quality of life in operated esophageal cancer patients: a randomized controlled trial                                                           | Chinese Clinical Trial Registry   | ChiCTR1800019823 | <a href="http://www.chictr.org.cn/showprojen.aspx?proj=32884">http://www.chictr.org.cn/showprojen.aspx?proj=32884</a>                       |
| Bertrand Le Roy   | effect of prehabilitation in gastrooesophageal adenocarcinoma: study protocol of a multicentric, randomised, control trial—the PREHAB study                                             | ClinicalTrials.gov                | NCT02780921      | <a href="https://pubmed.ncbi.nlm.nih.gov/27927660/">https://pubmed.ncbi.nlm.nih.gov/27927660/</a>                                           |
| Yu-Juan Xu        | Effects of a "Walk, Eat, & Breathe" Nursing Intervention for Patients With Esophageal Cancer                                                                                            | ClinicalTrials.gov                | NCT02850172      | <a href="https://clinicaltrials.gov/ct2/show/NCT02850172">https://clinicaltrials.gov/ct2/show/NCT02850172</a>                               |
| Augustinas Bausys | Prehabilitation for Gastrectomy (PREFOG)                                                                                                                                                | ClinicalTrials.gov                | NCT04223401      | <a href="https://clinicaltrials.gov/ct2/show/NCT04223401">https://clinicaltrials.gov/ct2/show/NCT04223401</a>                               |
| Author (PI)       | Title                                                                                                                                                                                   | Clinical Trial Registry           | Registration ID  | URL                                                                                                                                         |

|                 |                                                                                                                                                                    |                                                            |               |                                                                                                                                                                         |
|-----------------|--------------------------------------------------------------------------------------------------------------------------------------------------------------------|------------------------------------------------------------|---------------|-------------------------------------------------------------------------------------------------------------------------------------------------------------------------|
| M. Sosef        | Preoperative training for patients with esophageal cancer who will undergo resection (PC-OCR II)                                                                   | Netherlands Trial Register                                 | NTR3351       | <a href="https://www.trialregister.nl/trial/3200">https://www.trialregister.nl/trial/3200</a>                                                                           |
| Stefano Turi    | Prehabilitation in Esophageal Surgery (PRESS)                                                                                                                      | ClinicalTrials.gov                                         | NCT03798951   | <a href="https://clinicaltrials.gov/ct2/show/NCT03798951">https://clinicaltrials.gov/ct2/show/NCT03798951</a>                                                           |
| Makoto Yamasaki | Randomized controlled study on the efficacy of the exercise and amino acid for the elderly with esophageal squamous cell carcinoma during neoadjuvant chemotherapy | The University Hospital Medical Information Network Center | UMIN000034505 | <a href="https://upload.umin.ac.jp/cgi-open-bin/ctr_e/ctr_view.cgi?recptno=R000039340">https://upload.umin.ac.jp/cgi-open-bin/ctr_e/ctr_view.cgi?recptno=R000039340</a> |
| Susumu Aikou    | Randomized controlled trials on prevention of sarcopenia during gastric cancer surgery by exercise and nutrition intervention                                      | The University Hospital Medical Information Network Center | UMIN000033613 | <a href="https://upload.umin.ac.jp/cgi-open-bin/ctr_e/ctr_view.cgi?recptno=R000038333">https://upload.umin.ac.jp/cgi-open-bin/ctr_e/ctr_view.cgi?recptno=R000038333</a> |
| Linda O'Neill   | Rehabilitation strategies following oesophagogastric and Hepatopancreaticobiliary cancer (ReStOre II): a protocol for a randomized controlled trial                | ClinicalTrials.gov                                         | NCT03958019   | <a href="https://bmccancer.biomedcentral.com/articles/10.1186/s12885-020-06889-z">https://bmccancer.biomedcentral.com/articles/10.1186/s12885-020-06889-z</a>           |
